# Supplementary material for: A high-throughput screening identifies histone deacetylase inhibitors as therapeutic agents against medulloblastoma
Source: Exp Hematol Oncol. 2019 Nov 15;8:30. doi: 10.1186/s40164-019-0153-x (PMC6858705; doi:10.1186/s40164-019-0153-x)
Supplement: Supplementary file 1 — Additional file 1: Data S1. Dose response curves of Daoy cells treated with 125 compounds. [file 40164_2019_153_MOESM1_ESM.xlsx]

## Sheet: Dose Response Results
Compound_ID	Synonym	Curve	Data_Mode	IC50 Mode	Max_Conc [uM]	Min_Conc [uM]	IC50 [uM]	Sinf	S0	nHill	Sconst
SJ000285195-3	MERCAPTOPURINE		decreasing	=	50	0.00254026	2.92226	-50.927	2.17536	4
SJ000285199-3	OUABAIN		decreasing	=	50	0.00254026	0.587345	-54.7823	5.50675	3.03302
SJ000285203-5	ROTENONE		decreasing	=	50	0.00254026	0.0440877	-90.5409	9.19493	3.61469
SJ000285207-3	THIMEROSAL		decreasing	=	50	0.00254026	1.38153	-98.6692	4.48586	4
SJ000285208-3	THIOGUANINE		decreasing	=	50	0.00254026	4.71546	-47.331	6.78543	4
SJ000285212-2	PUROMYCIN HYDROCHLORIDE		decreasing	=	50	0.00254026	7.88282	-102.093	10.4323	4
SJ000285218-2	CANTHARIDIN		decreasing	=	50	0.00254026	8.81969	-96.2488	-0.493861	4
SJ000285220-5	PARTHENOLIDE		decreasing	=	50	0.00254026	8.94719	-101.912	-1.34519	4
SJ000285249-20	DACTINOMYCIN		decreasing	=	17.335	0.000880709	0.00443297	-92.9988	-2.96895	3.1368
SJ000285261-7	GENTIAN VIOLET		decreasing	=	50	0.00254026	3.16756	-102.329	13.399	0.931689
SJ000285294-4	PHENYLMERCURIC ACETATE		decreasing	=	50	0.00254026	4.80987	-100	11.1876	1.18691
SJ000285319-1	ALEXIDINE		decreasing	=	50	0.00254026	10.1487	-105.283	12.996	4
SJ000285321-11	MITOXANTHRONE		decreasing	=	40.975	0.00208175	2.35755	-100	-15.0907	0.918435
SJ000285327-10	SANGUINARINE SULFATE		decreasing	=	55.92	0.00284103	1.03533	-90.81	3.37559	4
SJ000285368-1	STROPHANTHIDIN		decreasing	=	50	0.00254026	0.353031	-50.3533	5.24862	3.22901
SJ000285410-5	CAMPTOTHECIN		decreasing	=	50	0.00254026	0.235676	-88.7705	14.8799	0.5
SJ000285423-2	PRISTIMERIN		decreasing	=	50	0.00254026	0.544699	-99.2839	12.1347	4
SJ000285437-1	NERIIFOLIN		decreasing	=	50	0.00254026	0.156837	-61.734	-11.734	4
SJ000285508-21	PACLITAXEL		decreasing (super-active)	<	42	0.00213382	0.00213382	-59.5666	0	0.920496
SJ000285512-1	CRASSIN ACETATE		decreasing	=	50	0.00254026	23.4891	-100	-2.42048	4
SJ000285546-3	PROBENECID		inactive	>	50	0.00254026	50				9.26088
SJ000285613-13	TOLBUTAMIDE		increasing (weakly active)	>	53	0.00269268	53	100	4.11602	0.5
SJ000285615-3	VIDARABINE		inactive	>	50	0.00254026	50				10.2627
SJ000285739-6	DIGOXIN		decreasing	=	50	0.00254026	0.636338	-53.2007	9.28608	2.47279
SJ000285841-2	PERUVOSIDE		decreasing	=	50	0.00254026	0.42845	-49.0642	0.935834	4
SJ000285845-9	NICARDIPINE		decreasing	=	56.5	0.0028705	1.20321	-94.8641	-3.55329	1.6351
SJ000285971-6	METHAZOLAMIDE		increasing (weakly active)	>	74.43	0.00378144	74.43	100	-2.42754	0.5
SJ000286054-1	CHLORANIL		decreasing	=	50	0.00254026	2.49195	-99.3157	4.37131	3.03011
SJ000286128-6	CELASTROL		decreasing	=	50	0.00254026	0.208561	-71.7379	7.69279	4
SJ000286159-1	PYRIMETHAMINE		decreasing	=	50	0.00254026	2.2969	-38.8365	11.1635	4
SJ000286248-2	ANTHOTHECOL		inactive	>	10	0.000508053	10				2.58021
SJ000286370-1	CYMARIN		decreasing	=	50	0.00254026	0.27853	-60.764	9.77004	1.81994
SJ000286424-1	BETA-DIHYDROROTENONE		decreasing	=	50	0.00254026	0.863734	-94.5756	4.14262	4
SJ000286436-1	DIHYDROROTENONE		decreasing	=	50	0.00254026	0.133492	-96.08	11.2813	4
SJ000286576-2	PATULIN		decreasing	=	50	0.00254026	0.69597	-97.2861	4.55428	3.45697
SJ000286711-11	GOSSYPOL		decreasing	=	50	0.00254026	4.62497	-100.966	3.96523	3.18879
SJ000286728-1	DEGUELIN(-)		decreasing	=	50	0.00254026	0.359556	-94.5853	8.45164	4
SJ000286762-1	CONVALLATOXIN		decreasing	=	50	0.00254026	0.106523	-51.3154	-1.3154	4
SJ000286781-1	TOMATINE		decreasing	=	50	0.00254026	0.864995	-95.8845	-11.7134	2.11808
SJ000286958-2	SALSOLIDINE		inactive	>	50	0.00254026	50				5.37185
SJ000286960-2	DIHYDROCELASTROL		decreasing	=	50	0.00254026	7.96499	-100	4.98688	1.1386
SJ000286965-1	10-HYDROXYCAMPTOTHECIN		decreasing	=	50	0.00254026	5.87572	-100	-11.6851	0.5
SJ000287007-1	GINKGETIN, K SALT		decreasing	=	50	0.00254026	1.26512	-91.8551	1.59391	4
SJ000287062-3	1-BENZYLOXYCARBONYLAMINOPHENETHYL CHLOROMETHYL KETONE		decreasing	=	50	0.00254026	2.74892	-98.2369	2.64105	3.07689
SJ000287130-1	LYSYLTRYPTOPHANYL-LYSINE ACETATE		decreasing (weakly active)	>	50	0.00254026	50	-100	3.04364	4
SJ000287209-13	FLUVASTATIN		decreasing	=	48	0.00243865	0.913464	-68.177	7.70483	1.62611
SJ000287222-7	ANTIMYCIN A		decreasing	=	50	0.00254026	0.0155004	-92.317	11.4515	4
SJ000287252-1	DEBRISOQUIN SULFATE		inactive	>	50	0.00254026	50				5.36256
SJ000287261-1	ANISOMYCIN		decreasing	=	50	0.00254026	3.52941	-100	9.54824	0.711754
SJ000287267-1	CEPHAELINE DIHYDROCHLORIDE HEPTAHYDRATE		decreasing	=	50	0.00254026	1.06748	-99.0344	7.89675	1.03956
SJ000287330-2	PIPERLONGUMINE		decreasing	=	10	0.000508053	1.51445	-99.0931	9.29404	4
SJ000287483-1	PROSCILLARIDIN A		decreasing	=	50	0.00254026	0.0407652	-62.6619	0	1.6266
SJ000287663-8	BREFELDIN A		inactive	>	50	0.00254026	50				-17.5827
SJ000287676-3	BAY 11-7085		decreasing	=	50	0.00254026	16.0156	-100	1.50719	3.45867
SJ000287697-4	NSC 95397		decreasing	=	50	0.00254026	4.51021	-100	-10.263	1.66449
SJ000287769-2	CANTHARIDIC ACID		decreasing	=	50	0.00254026	2.61012	-88.5621	15.6457	4
SJ000287864-6	SP600125		decreasing	=	50	0.00254026	0.346675	-102.656	-26.3055	0.853728
SJ000287925-12	IDARUBICIN		decreasing	=	38	0.0019306	0.205187	-97.7686	-1.51187	0.895614
SJ000288325-1	PIFITHRIN-MU		decreasing	=	50	0.00254026	10.3512	-104.001	7.78049	4
SJ000311301-2	NA		decreasing	=	73.735	0.00374613	5.02849	-101.051	2.08494	4
SJ000312176-2	AURORA KINASE/CDK INHIBITOR		decreasing	=	39.335	0.00199842	4.75344	-83.6328	4.21055	4
SJ000312204-2	NSC-663284		decreasing	=	33.065	0.00167988	3.99087	-100.39	-3.0793	4
SJ000312219-8	ALENDRONATE MONOSODIUM TRIHYDRATE		increasing	=	50	0.00254026	0.0260392	20	-30	4
SJ000312350-18	SORAFENIB		decreasing	=	47	0.00238785	17.1443	-91.8831	8.11689	4
SJ000312389-2	CERIVASTATIN		decreasing	=	36.5	0.00185439	0.611839	-89.2506	-15.2652	1.55044
SJ000357370-2	9,10-PHENANTHRENEQUINONE		decreasing	=	50	0.00254026	2.90536	-102.943	3.31465	4
SJ000518933-12	FLUDARABINE PHOSPHATE		decreasing	=	45.6	0.00231672	1.32393	-61.7554	2.76229	2.57904
SJ000518968-21	BORTEZOMIB		decreasing	=	50	0.00254026	0.0183221	-95.2344	-0.656396	3.09712
SJ000518971-1	METHYLENE BLUE		decreasing	=	45.65	0.00231926	2.56276	-92.1898	14.2322	3.0534
SJ000518973-1	CYCLOGUANIL NITRATE		decreasing	=	40	0.00203221	5.74548	-38.6849	11.3151	4
SJ000519019-2	ARSENIC TRIOXIDE		decreasing	=	50	0.00254026	10.0062	-101.958	0.440719	4
SJ000534770-2	TRICHOSTATIN A		decreasing	=	50	0.00254026	0.930283	-90.374	-5.06463	2.29262
SJ000556678-9	MOCETINOSTAT		decreasing	=	62.46	0.0031733	3.36929	-92.3903	-8.14012	3.21365
SJ000556682-7	SELUMETINIB		decreasing	=	62.305	0.00316542	49.6272	-102.16	-2.16029	1.47215
SJ000556697-3	GLIOTOXIN		decreasing	=	52.02	0.00264289	0.338811	-100.992	11.3976	4
SJ000560624-6	AT9283		decreasing	=	49.855	0.0025329	6.3556	-100	1.87115	0.878847
SJ000562343-3	RUTIN HYDRATE		increasing (weakly active)	>	50	0.00254026	50	100	0	0.5
SJ000562681-4	YM-155		decreasing	=	59.755	0.00303587	0.00388385	-97.9564	0	3.51951
SJ000562684-1	AURANOFIN		decreasing	=	50	0.00254026	1.33166	-100.924	0.273051	4
SJ000565182-9	ENTINOSTAT		decreasing	=	57.655	0.00292918	4.90779	-100	8.62813	0.844298
SJ000565185-9	DACINOSTAT		decreasing	=	53.46	0.00271605	0.0938417	-85.9777	1.9075	1.36444
SJ000574277-1	BELINOSTAT		decreasing	=	50.2	0.00255042	1.69648	-87.5574	-18.6777	1.84915
SJ000574279-1	ALVOCIDIB		decreasing	=	44.7	0.002271	0.342626	-78.5289	11.0643	1.80156
SJ000574282-3	PELITINIB		decreasing	=	12.23	0.000621348	11.3684	-100	0	2.16927
SJ000574284-1	BMS-387032		decreasing	=	44.55	0.00226337	0.741712	-54.4561	5.85739	2.78874
SJ000574289-1	STAUROSPORINE		decreasing	=	41.175	0.00209191	0.210654	-101.853	-27.4404	0.949708
SJ000755076-2	CA-074 ME		decreasing	=	52.28	0.0026561	4.34953	-95.8748	13.3927	4
SJ000755098-4	MG 132		decreasing	=	54.3	0.00275873	0.556963	-92.4469	4.8666	4
SJ000773170-2	STATTIC		decreasing	=	44.49	0.00226033	2.74592	-101.539	9.34956	4
SJ000782366-9	PITAVASTATIN		decreasing	=	40	0.00203221	0.0843296	-61.519	-0.791029	2.42523
SJ000782374-10	AT-7519		decreasing	=	56.545	0.00287278	3.4607	-54.7717	18.627	4
SJ000782378-13	CARFILZOMIB		decreasing	=	46.89	0.00238226	0.170022	-97.0306	8.55038	1.73771
SJ000782379-8	IXAZOMIB		decreasing	=	50	0.00254026	0.828648	-95.4497	10.3565	1.45145
SJ000784268-7	QUISINOSTAT		decreasing	=	51.735	0.00262841	0.0296524	-91.4363	8.56374	1.02079
SJ000785888-3	S-HDAC-42		decreasing	=	57.195	0.00290581	1.05409	-87.1921	-22.2412	1.88808
SJ000796024-3	ERASTIN		increasing (weakly active)	>	48.595	0.00246888	48.595	100	9.59482	0.5
SJ000796046-5	EVP4593		decreasing	=	24.2	0.00122949	0.0783327	-97.5123	8.11703	3.39186
SJ000806138-2	RILPIVIRINE		decreasing (weakly active)	>	60.435	0.00307042	60.435	-100	7.51123	0.930146
SJ000806159-7	BARDOXOLONE METHYL		decreasing	=	41.9	0.00212874	0.886931	-91.7734	11.4373	2.82664
SJ000821587-8	NVP-BGT226		decreasing	=	60.235	0.00306026	1.05355	-96.8357	-7.12831	3.77572
SJ000831486-1	BML285 (DIAMINOQUINAZOLINE)		decreasing	=	41.815	0.00212442	6.9765	-100.918	7.38632	2.91958
SJ000832167-1	BNTX MALEATE		decreasing	=	49.74	0.00252705	20.0857	-89.1753	10.8247	3.88647
SJ000832271-1	5-IODOTUBERICIDIN		decreasing	=	57.535	0.00292308	6.22598	-71.3184	6.10356	2.15919
SJ000832934-5	CUDC-907		decreasing	=	52.045	0.00264416	0.0144532	-92.5358	0	1.72276
SJ000833869-6	OPROZOMIB		decreasing	=	59.305	0.00301301	0.30413	-91.7981	-1.9685	3.13142
SJ000834147-2	ONX-0914		decreasing	=	57.16	0.00290403	0.415083	-93.2127	9.32387	4
SJ000834155-6	DELANZOMIB		decreasing	=	60.83	0.00309048	0.06962	-92.4951	1.99494	1.55432
SJ000834165-2	BAY 11-7082		decreasing	=	72.66	0.00369151	2.54485	-99.6599	-2.82754	1.74141
SJ000834166-3	TRIPTOLIDE		decreasing	=	50	0.00254026	0.396919	-86.9232	10.5898	2.01959
SJ000836342-3	PRALATREXATE		inactive	>	45	0.00228624	45				-7.89703
SJ000851875-2	SELINEXOR		decreasing	=	55.03	0.00279581	1.94086	-100	1.81697	0.814359
SJ000855136-4	DOXORUBICIN		decreasing	=	49	0.00248946	1.0133	-96.424	8.84875	1.62226
SJ000855181-2	ACIPIMOX		decreasing	=	40	0.00203221	35.96	-100	7.46521	0.821826
SJ000855221-1	DEGRASYN (WP1130)		decreasing	=	32.58	0.00165524	1.61108	-84.7549	6.16223	1.27218
SJ000855226-2	ARBIDOL HCL		inactive	>	48	0.00243865	48				-0.129897
SJ000855264-4	MITOXANTRONE		decreasing	=	38	0.0019306	2.97594	-100	-22.3783	1.16111
SJ000855285-1	JTC-801		decreasing	=	53.805	0.00273358	1.41943	-93.2149	6.35914	4
SJ000855295-1	PF-3845		decreasing	=	47.735	0.00242519	10.1432	-101.925	16.6253	4
SJ000855301-1	A-674563		decreasing	=	24.35	0.00123711	2.91279	-91.7591	4.56079	2.11873
SJ000855365-5	DAUNORUBICIN		decreasing	=	38	0.0019306	0.773199	-97.9178	8.24543	1.42092
SJ000855447-1	GZD824		decreasing	=	51.14	0.00259818	8.60168	-101.795	-3.93741	3.95942
SJ000855464-1	KPT-185		decreasing	=	41.86	0.00212671	1.12321	-94.8019	5.52157	1.10647
SJ000855488-1	P276-00		decreasing	=	52.05	0.00264441	2.22821	-73.1381	-8.7209	4
SJ000855501-1	NMS-873		decreasing	=	59.345	0.00301504	0.585903	-96.4898	10.6657	4
SJ000855540-1	ORIDONIN		decreasing	=	50	0.00254026	7.94818	-102.253	2.95899	4

## Sheet: Notes for Supplemental Data 1
Field	Description
Data_Mode	Direction of assay activity with increasing compound concentration; decreasing, increasing, inactive.
IC50 Mode	Indicator of support for IC50; "=" when the data captures the entire sigmoid curve, ">" when the concentration range did not capture the maximal activity, "<" when the concentration range did not capture the minimal activity.
Max_Conc [uM]	Maximum concentration of compound tested, in micromolar.
Min_Conc [uM]	Minimum concentration of compound tested, in micromolar.
IC50 [uM]	Concentration of compound that produced 50% of maximal activity, in micromolar.
Sinf	Parameter of curve fit, activity at infinite concentration.
S0	Parameter of curve fit, activity at concentration zero.
nHill	Parameter of curve fit, Hill constant.
Sconst	Parameter of curve fit, for inactive compounds the constant that describes the y-intercept of fit.
	This Excel workbook displays the dose-response curves and fitting parameters for the 125 selected primary hits.
